# Supplementary material for: A Novel Linear Plasmid Mediates Flagellar Variation in Salmonella Typhi
Source: PLoS Pathog. 2007 May 11;3(5):e59. doi: 10.1371/journal.ppat.0030059 (PMC1876496; doi:10.1371/journal.ppat.0030059)
Supplement: Table S1 — includes the sequential CDS numbers, the strand of the CDSs, the location of the CDSs, and the size (amino acids) of the putative protein encoded by the CDSs. Any features or hypothetical function of the putative proteins are also given. For putative proteins with significant BLASTP hits against the GenBank database, the organism, locus tag designation, and E-value of the best hit is provided. (60 KB XLS) [file ppat.0030059.st001.xls]

## Sheet: Sheet1
CDS	Strand	Location	Size (aa)	Putative Function / Feature	Organism, Locus Tag Designation and
					E-value of the Best BLASTP Hit
tir	na	1 - 1,230	na	Terminal Inverted Repeat	-
001	+	1,086 - 1,529	148	Unknown	-
002	-	1,545 - 2,330	262	Methyltransferase	Xylella fastidiosa XfasoDRAFT_2502 (3E-05)
003	-	2,412 - 3,140	242	Methyltransferase	Burkholderia vietnamiensis Bcep1808DRAFT_6880 (8E-08)
004	-	3,159 - 3,923	254	Unknown	-
005	-	3,935 - 4,402	155	Unknown	-
006	-	4,271 - 5,431	236	Ankyrin Repeat Protein	-
007	-	5,428 - 5,802	124	Unknown	-
008	-	5,854 - 6,144	291	Predicted Helix-turn-Helix Containing Protein	Yersinia bercovieri YberA_01003485 (6E-30)
009	-	6,141 - 6,494	117	Unknown	Azotobacter vinelandii AvinDRAFT_0527 (4E-20)
010	+	6,694 - 7,242	182	Unknown	-
011	-	7,288 - 7,629	113	Unknown	-
012	-	7,698 - 8,438	246	Unknown	Sphingopyxis alaskensis Sala_0427 (3E-09)
013	-	8,555 - 8,899	114	2 Transmembrane Helices	-
014	-	8,939 - 9,190	84	Unknown	-
015	-	9,366 - 9,671	101	Unknown	-
016	-	9,794 - 10,918	374	Unknown	-
017	+	11,066 - 11,707	213	Nucleotide Binding Protein	Shewanella baltica SbalDRAFT_1149 (2E-09)
018	+	11,745 - 12,047	100	Unknown	-
019	+	12,199 - 14,133	644	Protein With Coiled-Coil Domain	-
020	+	14,144 - 14,884	246	Unknown	-
021	+	14,957 - 17,287	776	Unknown	Staphylococcus aureus SAR0061 (2E-07)
022	+	17,290 - 17,547	86	Unknown	-
023	-	17,603 - 17,851	83	2 Transmembrane Helices	-
024	-	17,940 - 18,350	136	2 Transmembrane Helices	-
025	-	18,340 - 18,852	170	Unknown	-
026	+	19,024 - 21,312	762	7 Transmembrane Helices	Escherichia coli eco2003 (9E-70)
027	+	21,536 - 21,961	141	3 Transmembrane Helices	-
028	+	21,958 - 22,494	178	Unknown	-
029	+	22,481 - 23,074	187	Unknown	-
030	+	23,089 - 23,418	109	Unknown	Salmonella Typhi sfuA (2E-39)
031	+	23,695 - 25,161	488	Phase II Flagellin (fljBz66)	Salmonella Typhi fljB (0.0)
032	+	25,242 - 25,766	174	Repressor of Phase I Flagellin (fljA)	Salmonella Typhi fljA (5E-100)
033	-	25,774 - 25,953	60	Unknown	-
tir	na	25,809 - 27,037	na	Terminal Inverted Repeat	-

## Sheet: Sheet3
Primer	Sequence 5΄-3΄	Target gene
z66flag_R	ttaacgcagcagagacagtac	z66 flagellin
z66flag_F	atggcacaagtcatcaatac	z66 flagellin
aroC_F	ggcaccagtattggcctgct	aroC
aroC_R	catatgcgccacaatgtgttg	aroC
z66_red_1	tacggtacaatacccactataacgacaaaaacccccatatgttccaccctgtgtgtaggctggagctgcttcg	pBSSB1 tag 5΄
z66_red_2	agtggaatgggtggaatatgtggaatgctttccaaggcattgatatatcatatgaatatcctcctta	pBSSB1 tag 5΄
z66_red_3	acaatctggttgaagtctataaaatggatatcctggacgacccgcacgattgtgtaggctggagctgcttcg	pBSSB1 tag 3΄
z66_red_4	tctaaactccccttccctaccgttcgtgcttctctctcttaacatgaactcatatgaatatcctcctta	pBSSB1 tag 3΄
tir_A	gaatctggcttatcagggtg	tir internal
tir_B	actacgatatgtagaaccag	tir internal
tir_C	caagtggctgtactgctttac	tir internal
tir_D	ctatcatagacattgcacgag	tir unique
tir_E	gcatcactcgaagaattgccg	tir unique
tir_F	tttagctatccagtggaatggg	tir Southern probe
tir_G	attccagacggcgataagcttg	tir Southern probe
